# Supplementary material for: Increasing the cytotoxicity of Ru(ii) polypyridyl complexes by tuning the electron-donating ability of 1,10-phenanthroline ligands
Source: Royal Society of Chemistry journal article supplement (doi:10.1039/d2dt02332f), 2022-01-01
Supplement: d2dt02332f1.pdf [file d2dt02332f1.pdf]

## Supporting Information

### Increasing the cytotoxicity of Ru(II) polypyridyl complexes by tuning the electron donating ability of 1,10-phenanthroline ligands

Yang Lu<sup>a\*</sup>, Zhiying Hou<sup>a</sup>, Mengshan Li<sup>b</sup>, Ning Wang<sup>a</sup>, Jinhui Wang<sup>a</sup>, Feng, Ni<sup>a</sup>, Yufen Zhao<sup>a</sup>,

Bin Zhang<sup>c\*</sup>, Ning Xi<sup>a\*</sup>

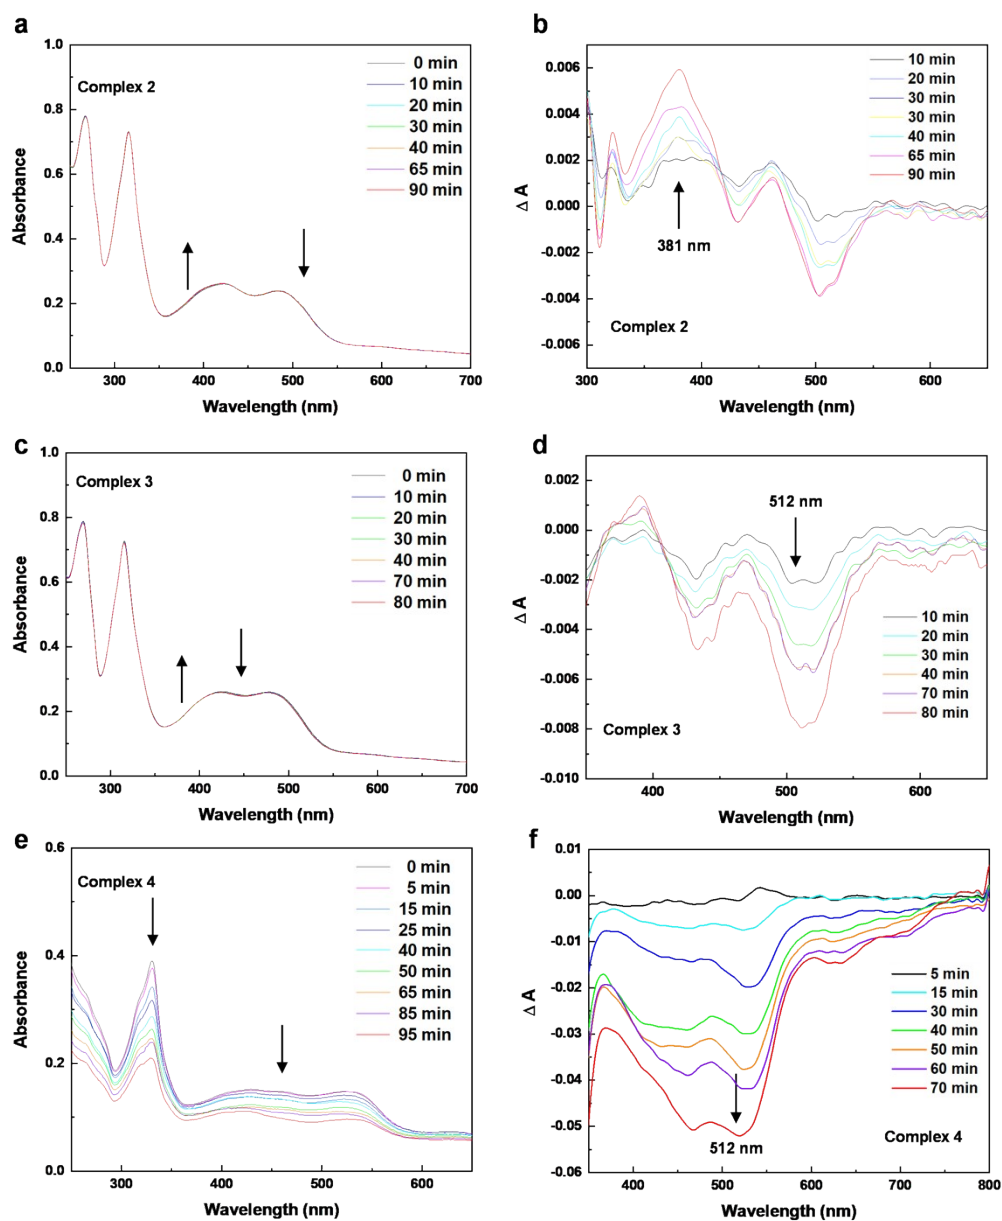

**Fig. S1** a) b) Time evolution of UV-Vis difference spectra during the interaction of the complex 2, c) d) complex 3, and e) f) complex 4 ( $\Delta A = A_t - A_0$ ).

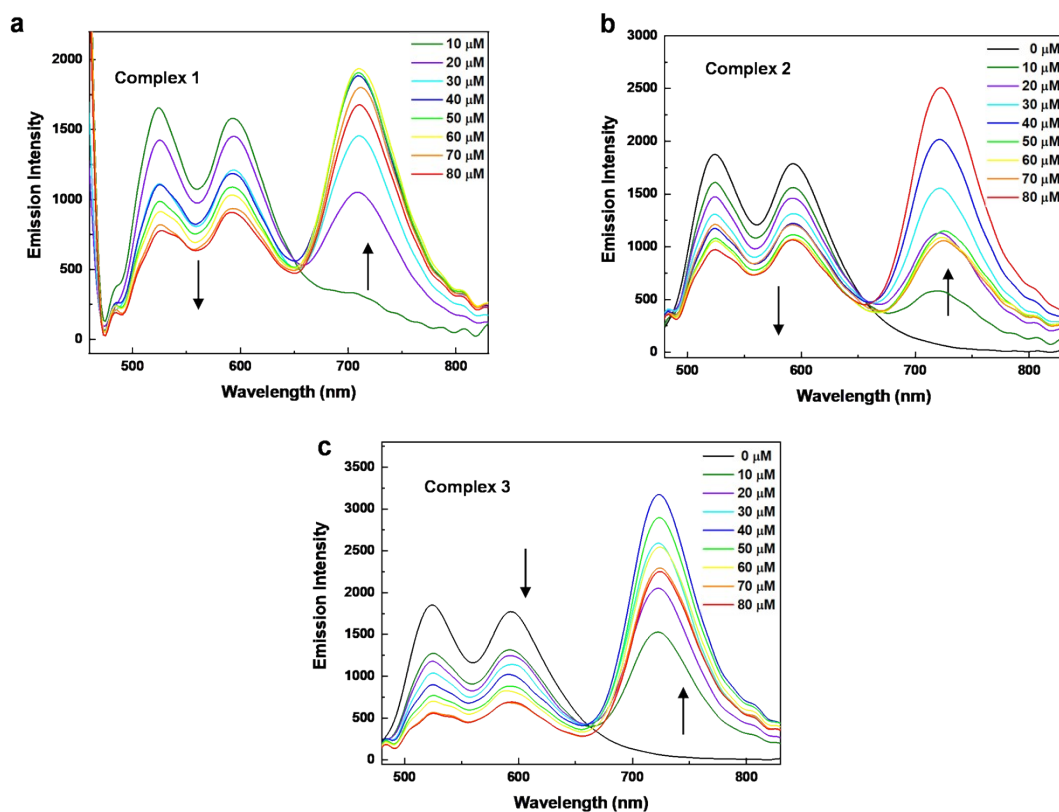

Fig. S2 a) - c) Emission spectra of EB bound to DNA in the presence of complexes 1-3.

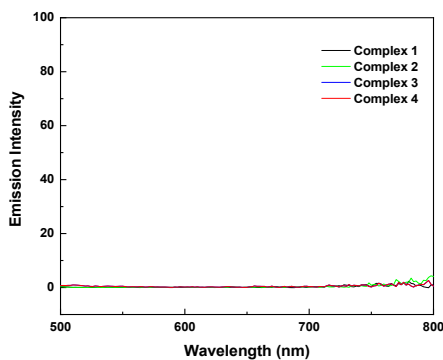

Fig. S3 Emission spectra of pristine complexes 1-4.

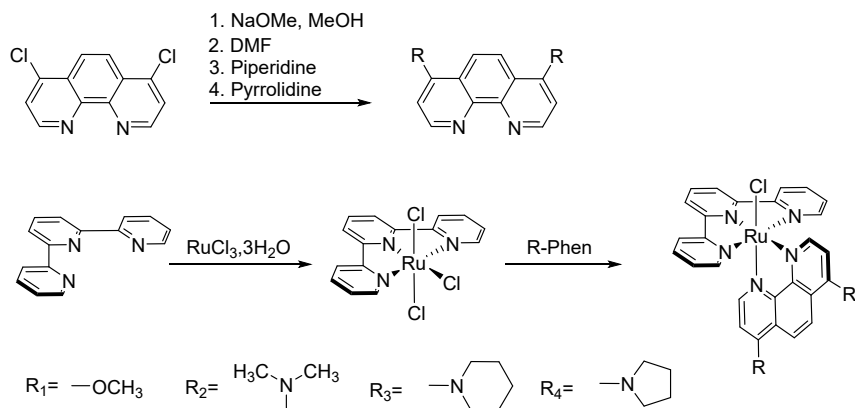

Scheme 1 Synthesis route of complexes 1-4.

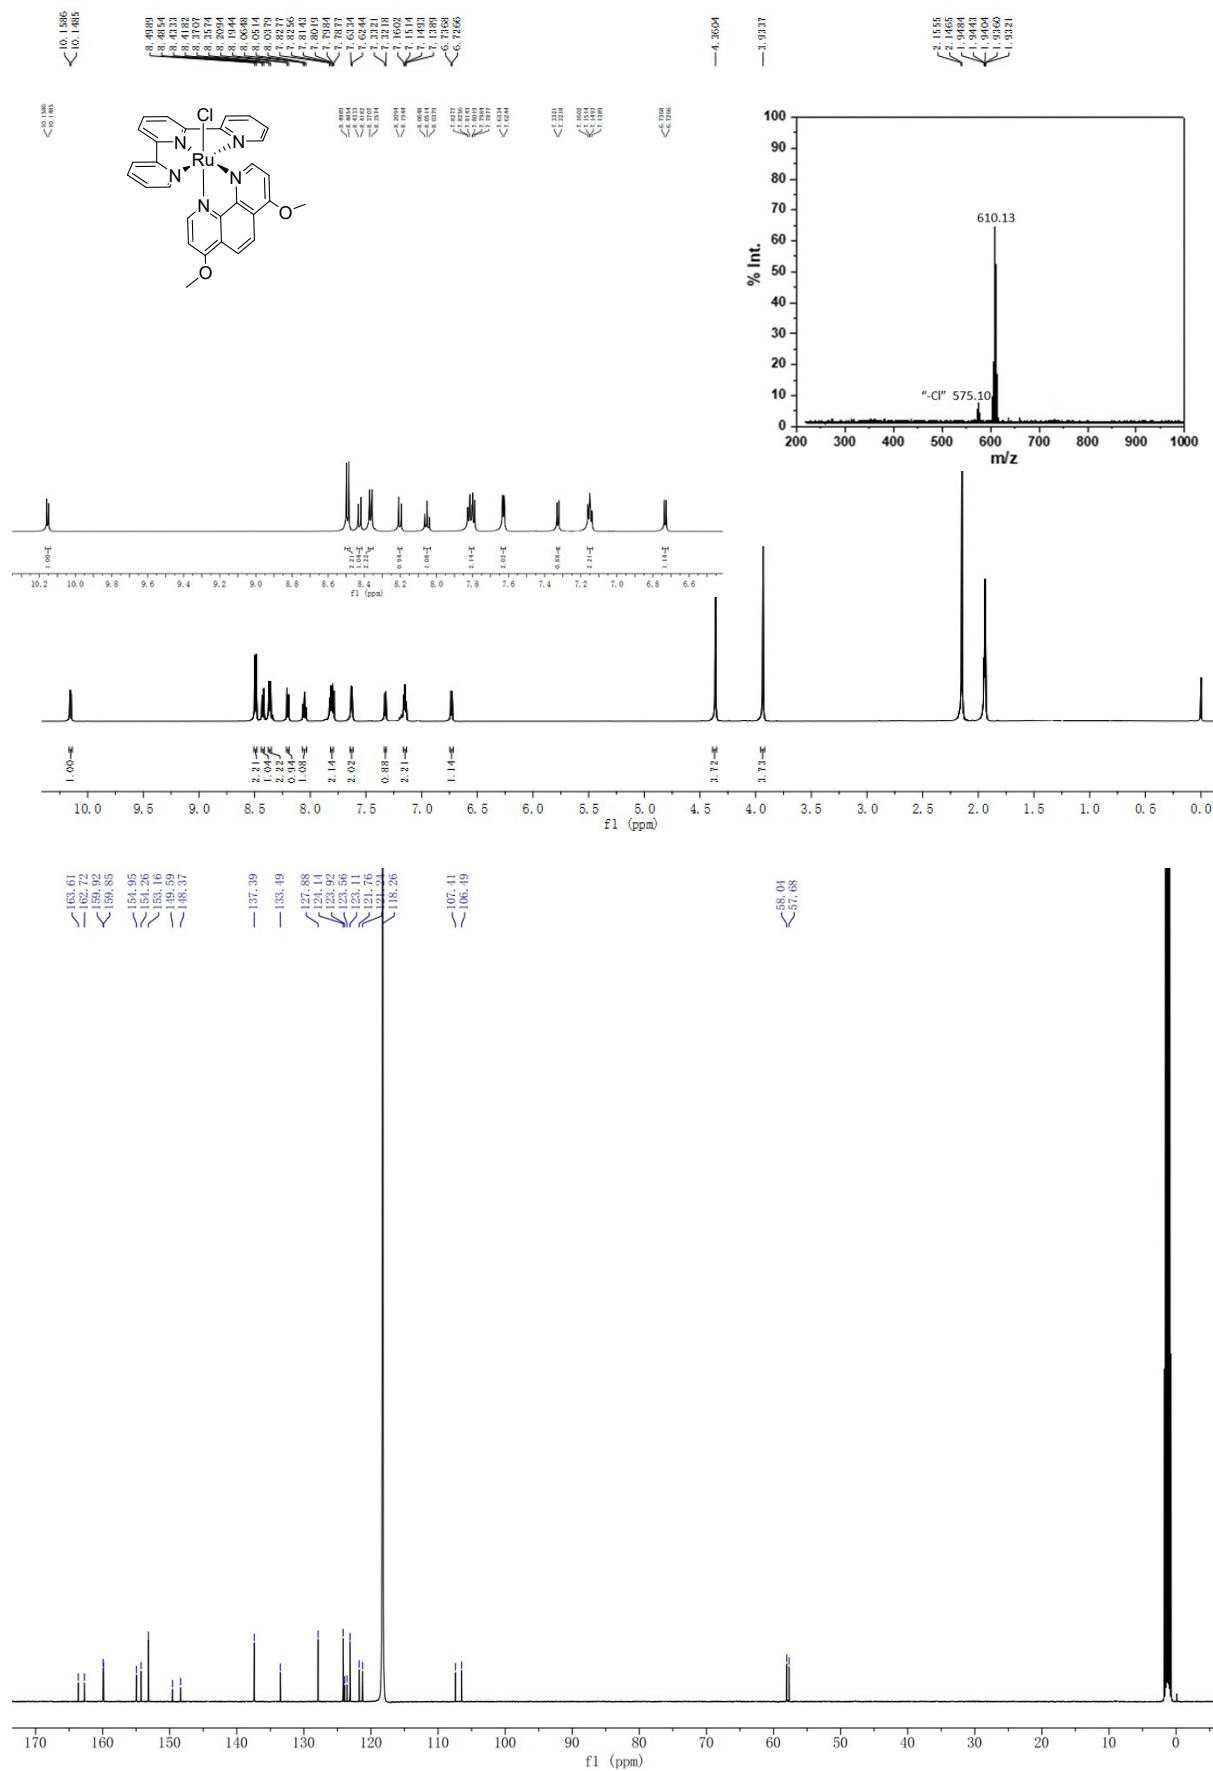

**Fig. S4** <sup>1</sup>H NMR(600 MHz, CD<sub>3</sub>CN), <sup>13</sup>C (125 MHz, CD<sub>3</sub>CN), and MALDI-TOF mass spectra of [Ru(tpy)(MeO-phen)Cl](PF<sub>6</sub>) (1).

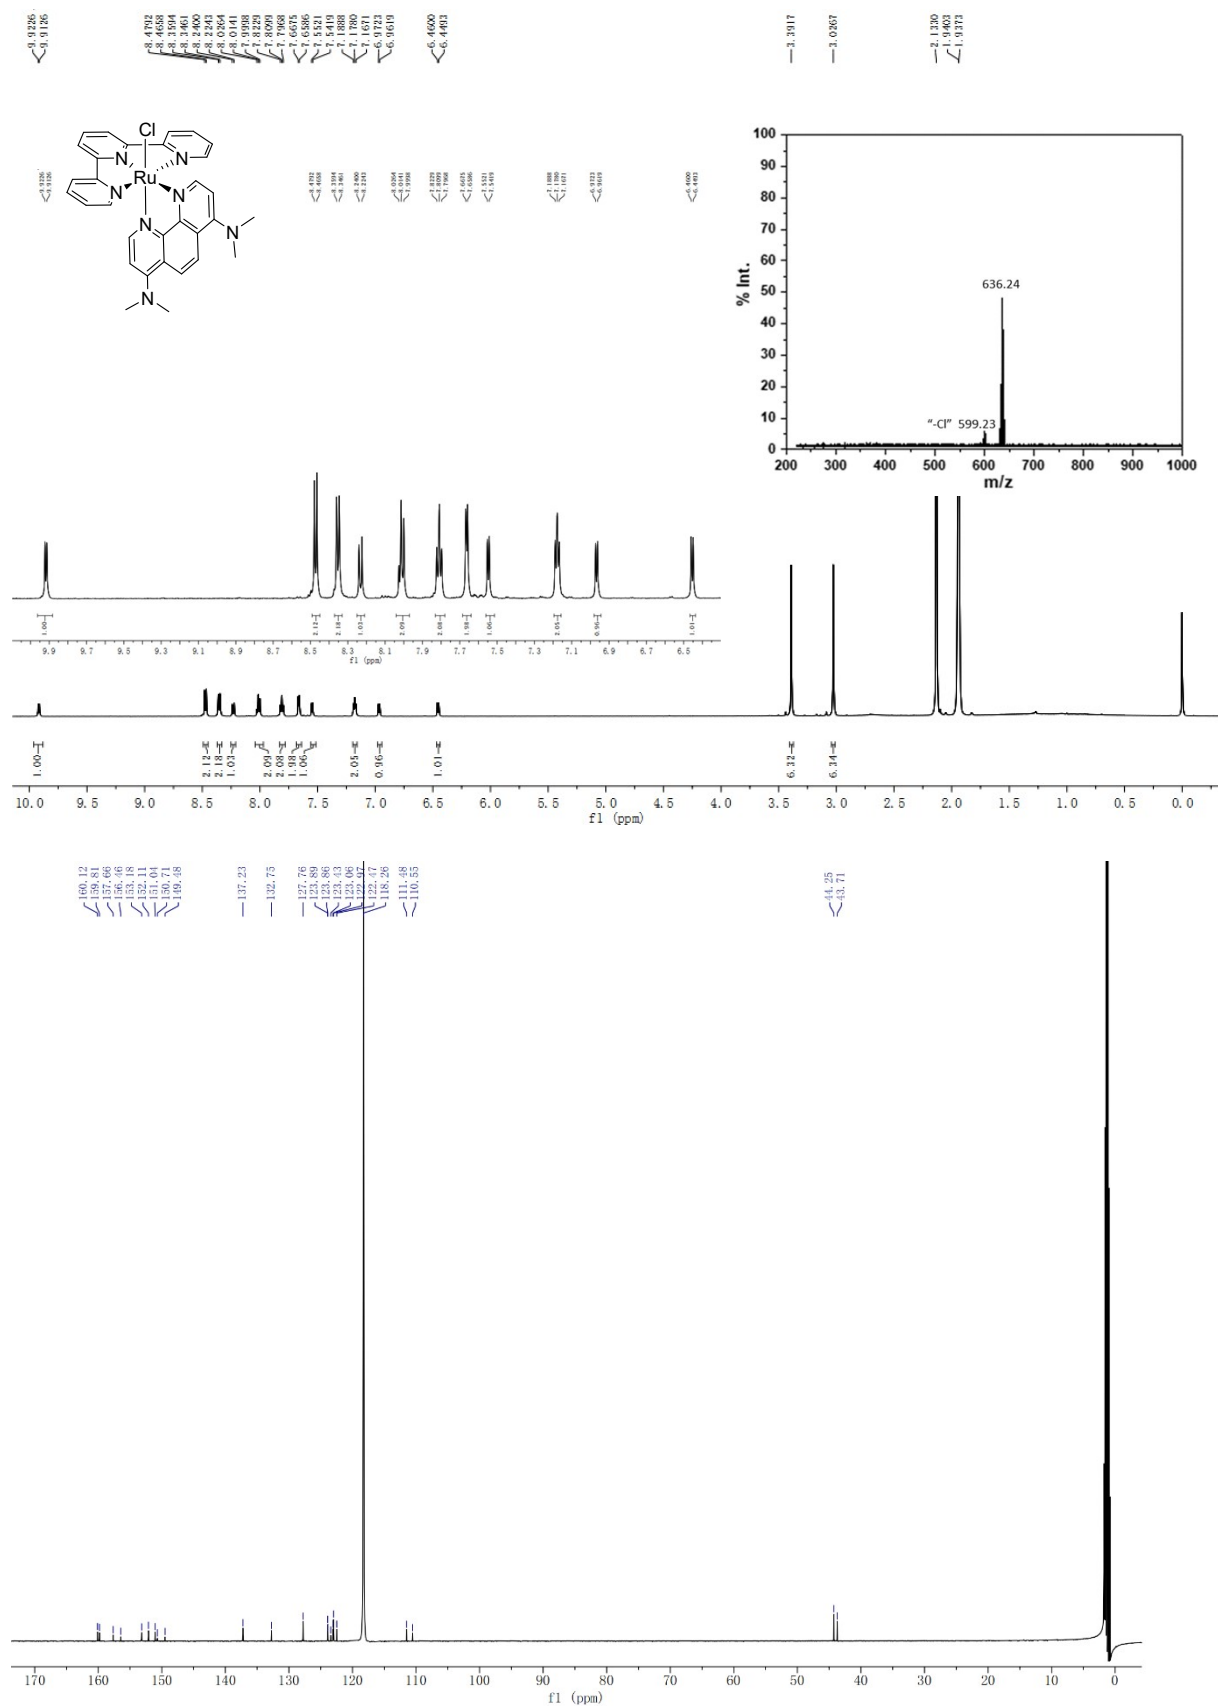

**Fig. S5**  $^1\text{H}$  NMR(600 MHz,  $\text{CD}_3\text{CN}$ ),  $^{13}\text{C}$  (125 MHz,  $\text{CD}_3\text{CN}$ ), and MALDI-TOF mass spectra of  $[\text{Ru}(\text{tpy})(\text{Amn-phen})\text{Cl}](\text{PF}_6)$  (**2**).



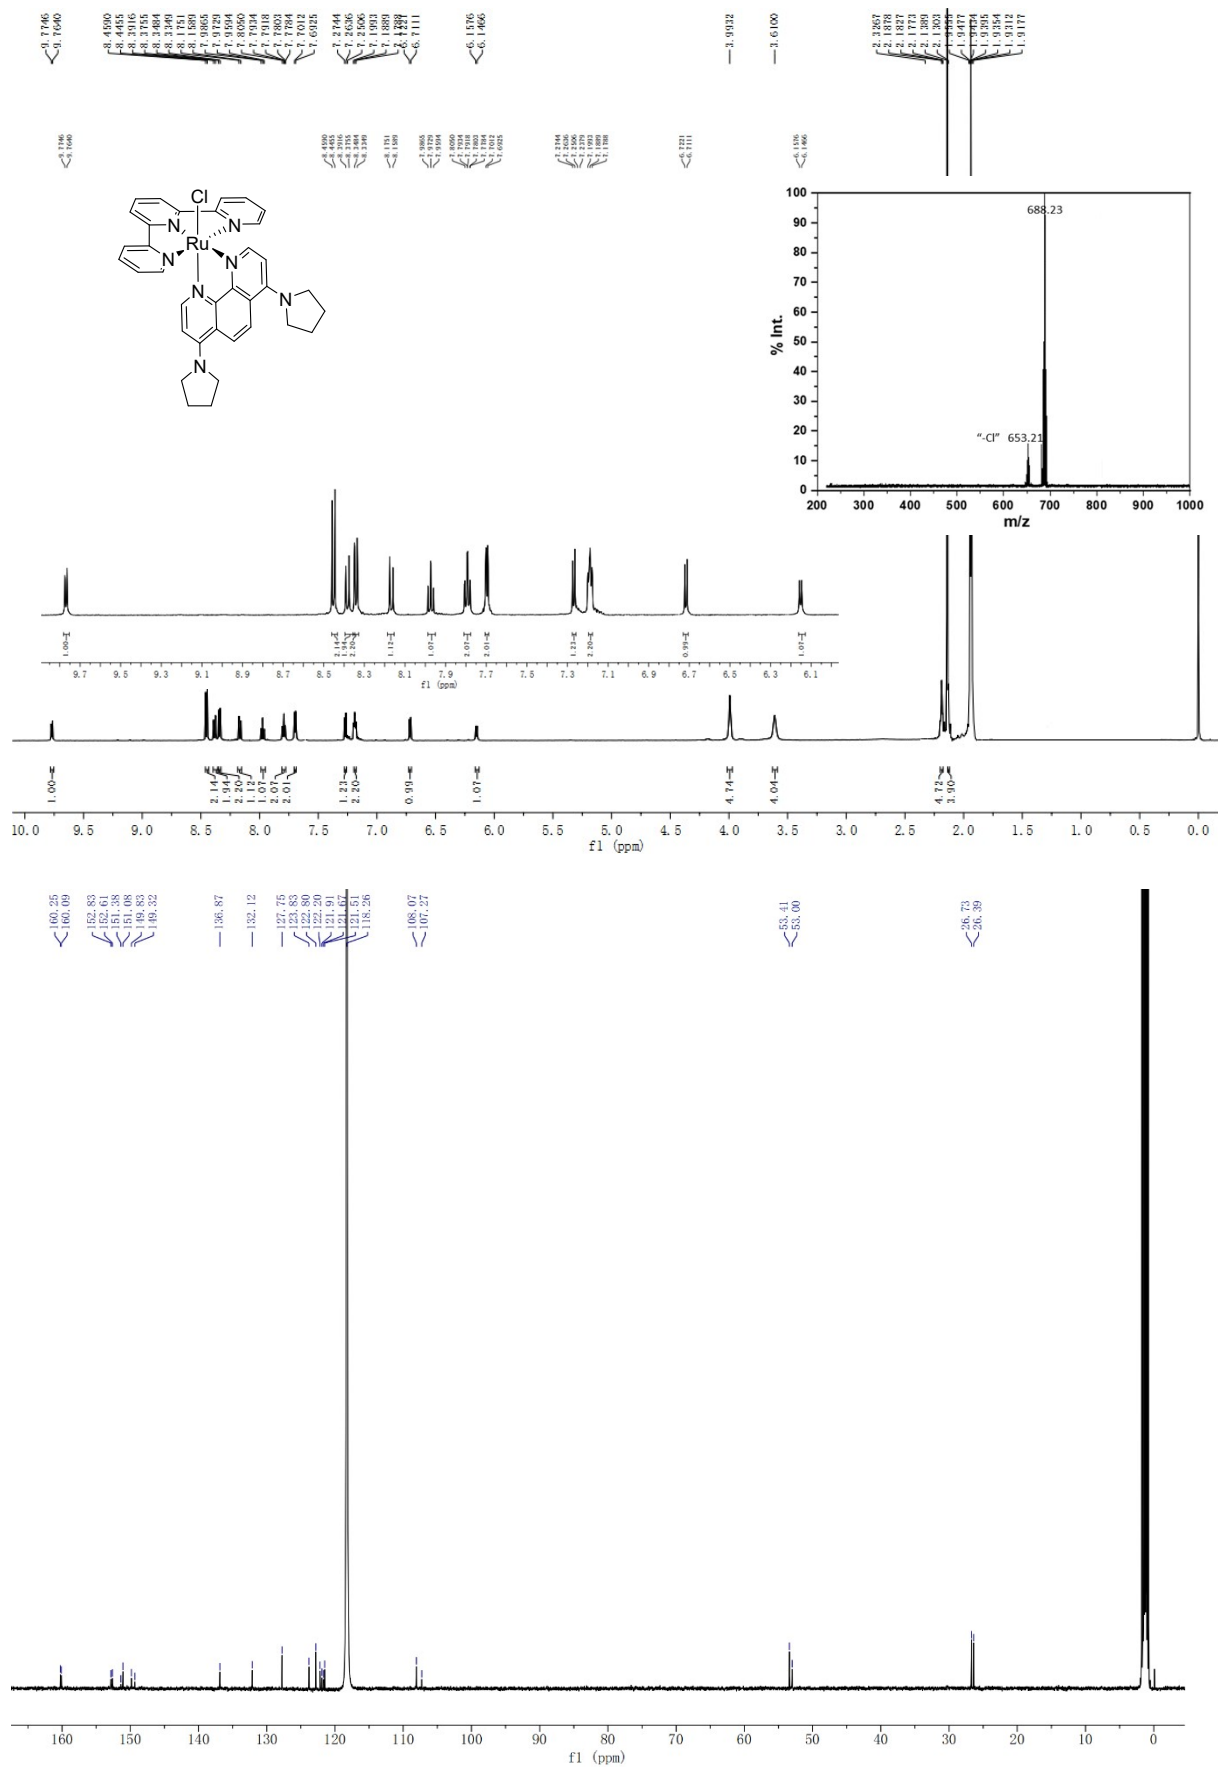

**Fig. S7** <sup>1</sup>H NMR (600 MHz, CD<sub>3</sub>CN), <sup>13</sup>C (125 MHz, CD<sub>3</sub>CN), and MALDI-TOF mass spectra of [Ru(tpy)(Pyr-phen)Cl](PF<sub>6</sub>) (**4**).

**Table S1.** Observed pseudo-first order rate constants as a function of ligand concentration and temperature for the substitution reactions between complexes and L-His in 25 mM Hepes buffer containing 30 mM NaCl (pH=7.6).

| <b>Compound</b> | <b><math>\lambda(\text{nm})</math></b> | <b><math>10^3 C_L/\text{M}</math></b> | <b><math>10^4 k_{\text{obsd}}/\text{s}^{-1}</math></b> |
|-----------------|----------------------------------------|---------------------------------------|--------------------------------------------------------|
| Complex 1       | 464                                    | 4.0                                   | 2.99 (2) <sup>a</sup>                                  |
|                 |                                        | 3.0                                   | 2.33 (2)                                               |
|                 |                                        | 2.1                                   | 1.86 (2)                                               |
|                 |                                        | 1.0                                   | 1.31(2)                                                |
|                 |                                        | 0.6                                   | 0.46 (2)                                               |
| Complex 2       | 381                                    | 4.0                                   | 3.58 (2)                                               |
|                 |                                        | 3.0                                   | 2.66 (2)                                               |
|                 |                                        | 2.1                                   | 1.99 (2)                                               |
|                 |                                        | 1.0                                   | 1.51 (2)                                               |
|                 |                                        | 0.6                                   | 0.75 (2)                                               |
| Complex 3       | 512                                    | 4.0                                   | 4.55 (2)                                               |
|                 |                                        | 3.0                                   | 3.58 (2)                                               |
|                 |                                        | 2.1                                   | 2.33 (2)                                               |
|                 |                                        | 1.0                                   | 1.76 (2)                                               |
|                 |                                        | 0.6                                   | 1.21 (2)                                               |
| Complex 4       | 512                                    | 4.0                                   | 7.20 (2)                                               |
|                 |                                        | 3.0                                   | 5.30 (2)                                               |
|                 |                                        | 2.1                                   | 3.60 (2)                                               |
|                 |                                        | 1.0                                   | 2.44 (2)                                               |
|                 |                                        | 0.6                                   | 2.00 (2)                                               |

<sup>a</sup> Number of runs in parenthesis
